# Supplementary material for: A polysaccharide from Fagopyrum esculentum Moench bee pollen alleviates microbiota dysbiosis to improve intestinal barrier function in antibiotic-treated mice
Source: Royal Society of Chemistry journal article supplement (doi:10.1039/d0fo01948h), 2020-01-01
Supplement: d0fo01948h1.pdf [file d0fo01948h1.pdf]

**Supporting information**

**Polysaccharide from *Fagopyrum esculentum* Moench bee pollen alleviates microbiota dysbiosis to improve intestinal barrier function in antibiotic-treated mice**

**Liuying Zhu,<sup>‡</sup><sup>a</sup> Juan Li,<sup>‡</sup><sup>a</sup> Changhao Wei,<sup>a</sup> Ting Luo,<sup>a</sup> Zeyuan Deng,<sup>a,b</sup> Yawei Fan<sup>\*a</sup> and Liufeng Zheng<sup>\*a</sup>**

<sup>a</sup>*State Key Laboratory of Food Science and Technology, Nanchang University, Nanchang 330047, Jiangxi, P. R. China*

<sup>b</sup>*Institute for Advanced Study, University of Nanchang, Nanchang 330031, Jiangxi, P. R. China*

**\*Correspondence to:** Liufeng Zheng. *E-mail address:* zhenglf2018@ncu.edu.cn;

Yawei Fan. *E-mail address:* yaweifan@ncu.edu.cn

<sup>‡</sup>The two authors equally contributed to the study.

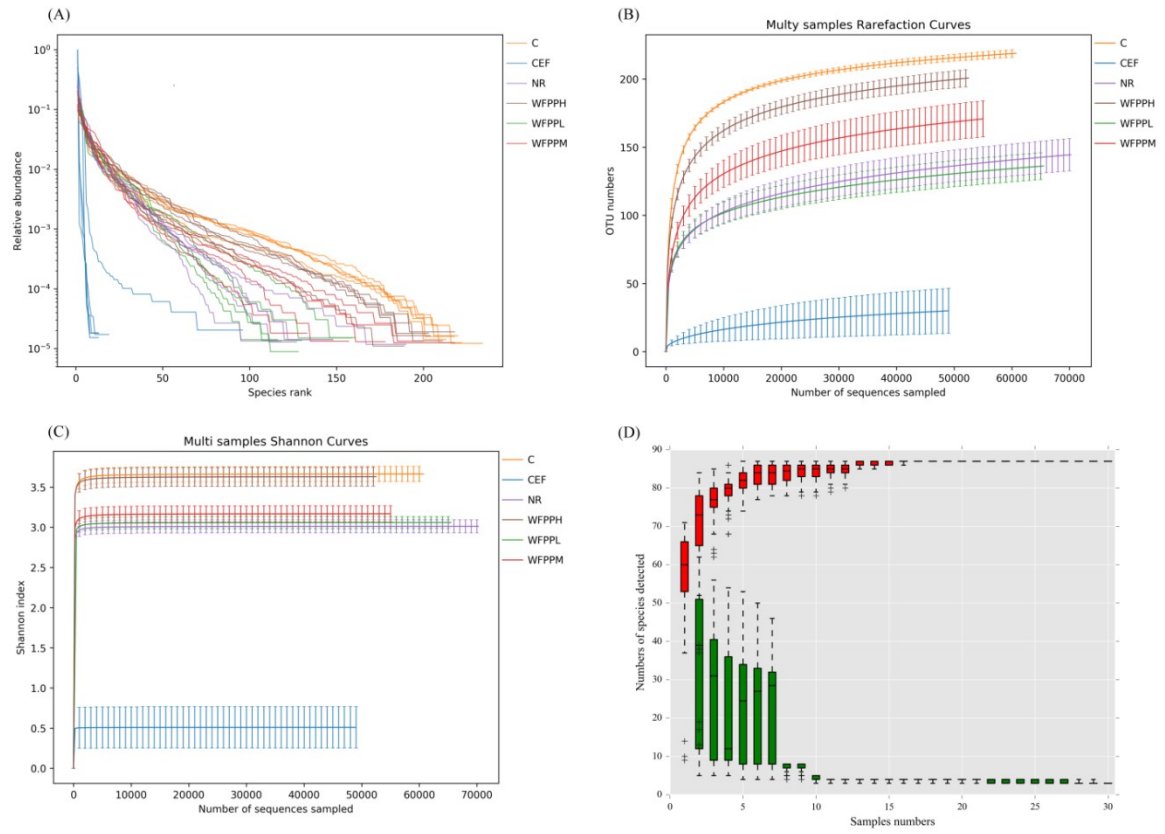

**Figure S1. OTU rank curves (A), Rarefaction curves (B), Shannon curves (C), and genus accumulation curves (D).**

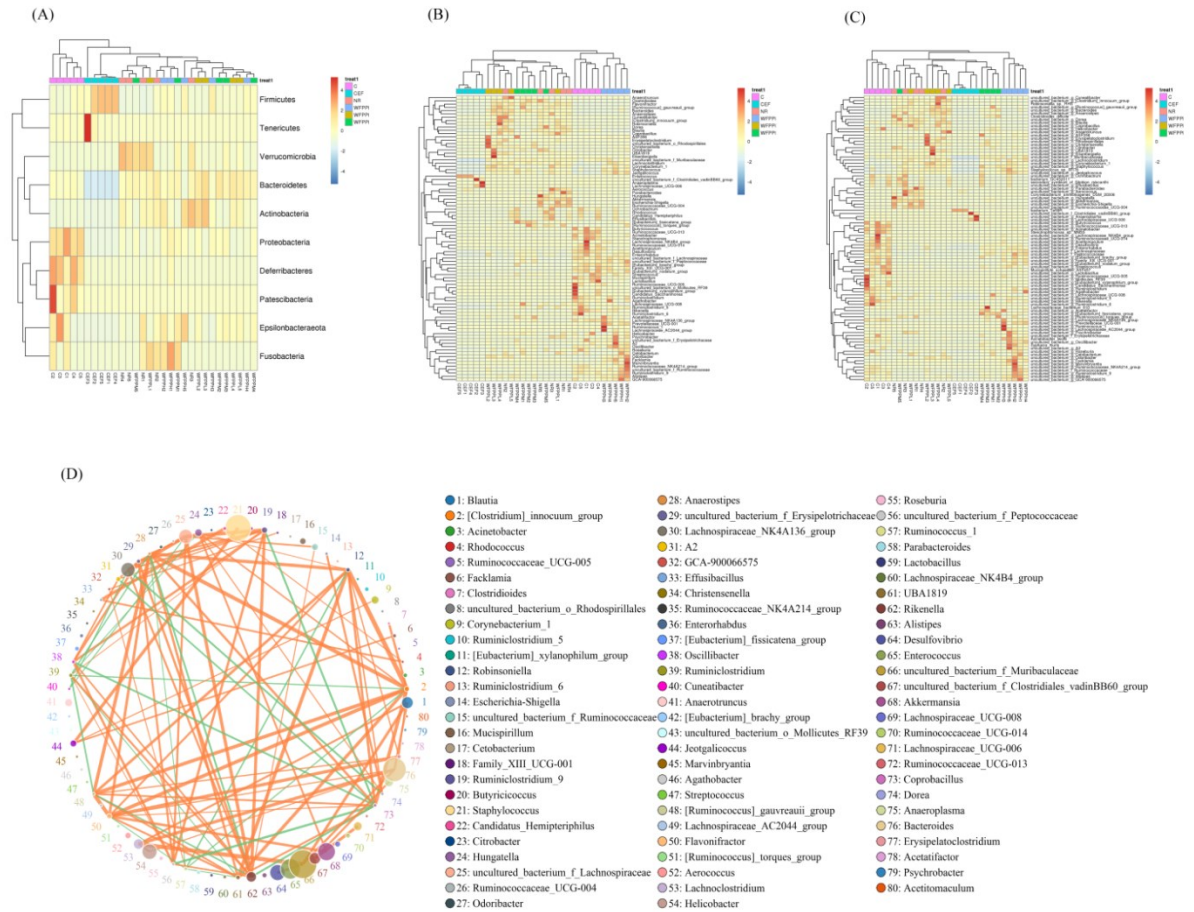

**Figure S2. Heatmaps of gut microbiota in phylum (A), genus (B) and species levels (C) and the network analysis in genus level (D).**
